# Supplementary material
Source: publisher site journal article supplement (https://www.dovepress.com/article/564477)
Supplement: Supplementary file 1 [file Supplementary%20materials%20%20A-D.docx]

Supplementary material A: Semi-Structured Interview Guides

1. Interview Guide for Medical Staff

Responsibilities and workflow in the medical–prevention integration model

Barriers to information exchange and inter-institutional collaboration

Resource allocation and equipment support at the primary level

Suggestions for optimizing the coordination mechanism

2. Interview Guide for Older Adults with Chronic Diseases

Perceived changes in medical service access (distance, cost, convenience)

Experiences with follow-up services and health education

Difficulties in disease self-management (e.g., understanding medical data, medication adherence)

Expectations for improved services

3. Interview Guide for Policymakers

Policy design and financial support for the integration model

Evaluation of implementation effectiveness and key challenges

Incentive mechanisms for medical staff and resource allocation strategies

Supplementary material B: Measurement Tools

1. Health Literacy Scale (adapted from the Chinese Citizen Health Literacy Scale)

Dimension 1: Basic health knowledge (e.g., "Normal range of blood pressure for older adults")

Dimension 2: Chronic disease management knowledge (e.g., "Frequency of blood glucose monitoring for type 2 diabetes")

Dimension 3: Healthy lifestyle (e.g., "Recommended daily salt intake for hypertension patients")

Dimension 4: Basic medical skills (e.g., "Correct way to measure blood pressure at home")

Scoring: 1 point for each correct answer, total score range: 0–40 points (higher scores indicate higher health literacy)

2. Patient Satisfaction Questionnaire for Medical–Prevention Integration Services

5-point Likert scale (1=strongly dissatisfied, 5=strongly satisfied)

Core items:

1. Accessibility of community-based chronic disease management services

2. Clarity of health education materials provided by medical staff

3. Timeliness of follow-up reminders and health guidance

4. Effectiveness of communication with family doctors

5. Overall satisfaction with the integrated service model

Supplementary material C: Quantitative Analysis Details

1. Variable Definitions

| Variable Type | Variable Name | Definition | Measurement Scale |
| --- | --- | --- | --- |
| Dependent | Per capita annual outpatient costs | Total outpatient expenses for chronic disease management in one year | Continuous (RMB) |
| Dependent | Per capita annual hospitalization costs | Total hospitalization expenses related to chronic diseases in one year | Continuous (RMB) |
| Dependent | Chronic disease control rate | Proportion of patients with blood pressure <140/90 mmHg and/or blood glucose <7.0 mmol/L | Binary (1=controlled, 0=uncontrolled) |
| Independent | Participation in integration model | Monthly frequency of participating in chronic disease management services | Continuous (times/month) |
| Independent | Age | Participant’s age at enrollment | Categorical (60–70 years, >70 years) |
| Independent | Educational attainment | Highest level of education completed | Categorical (primary school or below, secondary school and above) |
| Independent | Regional economic status | Economic development level of the study area | Categorical (developed, less developed) |

2. Heckman Two-Stage Model Equations

First stage (Probit model):

Where if participant engaged in the integration model, 0 otherwise; normal cumulative distribution function; term

Second stage (Multiple linear regression):

Where ; ; ;

3. Statistical Software: Stata 17.0 (StataCorp LLC, College Station, TX, USA)

Supplementary material D: Qualitative Analysis Coding Framework Example

| Coding Level | Code Name | Code Definition | Example Quotations |
| --- | --- | --- | --- |
| First-level | Resource integration | Measures taken to combine medical and preventive service resources | "We established a data-sharing platform between hospitals and community health centers" |
| First-level | Policy support | Government financial or institutional support for the model | "Each participant receives a 120 RMB annual subsidy for chronic disease management" |
| Second-level | Coordination obstacles | Barriers to collaboration between medical and public health institutions | "Responsibilities between hospitals and CDC are not clearly defined" |
| Second-level | Demand gaps of disadvantaged groups | Unmet service needs of older or less educated populations | "I can’t understand the health education brochures because I can’t read well" |
| Third-level | Key effectiveness elements | Core factors driving model success | Information exchange, financial guarantees |
| Third-level | Ethical risk points | Risks of unfair resource allocation | "Services tend to prioritize younger, more cooperative patients" |
